# Supplementary figures and images for: Study on a co-doped CdZnTe crystal containing Yb and In
Source: Royal Society of Chemistry journal article supplement (doi:10.1039/c8ce02032a), 2019-01-01

Supporting Information:

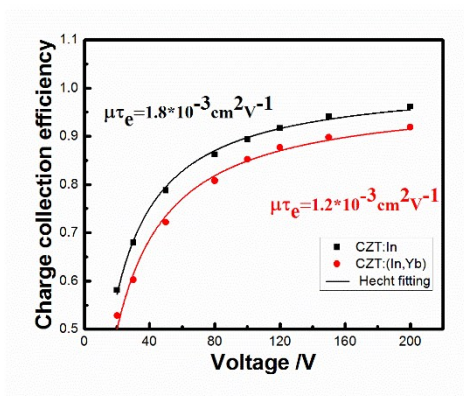

Figure S1 The hecht fitting results for CZT: In and CZT: (In, Yb)

Supplement: c8ce02032a1.pdf [file c8ce02032a1.pdf]
